# Supplementary material
Source: bioRxiv or medRxiv preprint supplement (https://www.biorxiv.org/highwire/filestream/37622/field_highwire_adjunct_files/0/127373-1.pdf)
Supplement: Supplementary file [file 127373-1.pdf]

# Autonomous combinatorial colour barcoding for multiplexing single molecule RNA visualization

Yong-Sheng Cheng<sup>1\*</sup>, Yue Zhuo<sup>1</sup>, Katharina Hartmann<sup>1</sup>,  
Peng Zou<sup>1</sup>, Gözde Bekki<sup>1</sup>, Heike Alter<sup>1</sup> & Hai-Kun Liu<sup>1\*</sup>

<sup>1</sup>Division of Molecular Neurogenetics, German Cancer  
Research Center (DKFZ), DKFZ-ZMBH Alliance, Im  
Neuenheimer Feld 280, Heidelberg, 69120, Germany.

\*Correspondence: [yongsheng.cheng@dkfz.de](mailto:yongsheng.cheng@dkfz.de) and  
[l.haikun@dkfz.de](mailto:l.haikun@dkfz.de)

## Supplementary Figures

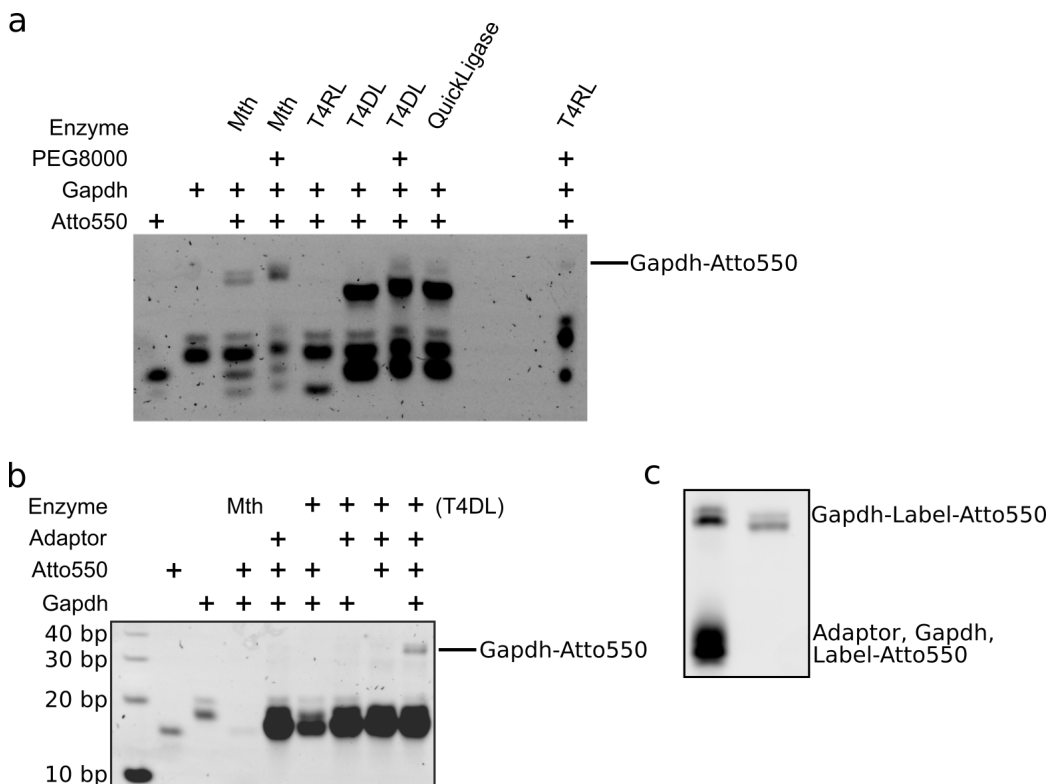

Figure 1: T4DL based HuluFISH 1.0 labelling and purification. (a) Various enzymes used for conjugating Gapdh oligo pool. Mth for Thermostable 5' AppDNA/RNA Ligase (NEB, M0319S). T4RL for T4 RNA ligase 1 (NEB, M0204S). QuickLigase (NEB, M2200S). The adaptor for T4DL was not 3' end amine blocked, therefore there is a thick band below Gapdh-Atto550 band. (b) Quality control reaction for HuluFISH labelling. Single oligo component or T4DL ligation reaction single component knockout condition. TrackIt™ 10 bp DNA Ladder (ThermoFisher, 10488019) was used as marker. Gel were stained with 3×GelRed in water. (c) Urea-PAGE gel purification of HuluFISH probe. The upper band is ligated HuluFISH probe, it runs slightly faster after purification (2<sup>nd</sup> lane).



## Supplementary Tables

Table 1: Oligo sequences for HuluFISH

| Name                          | Sequences                                    | Notes                                |
|-------------------------------|----------------------------------------------|--------------------------------------|
| Label Atto550 (Hulu 1.0)      | CTAAATCCAT <sub>z</sub> A                    | z, Amino-C6-dT with Atto550          |
| Adaptor for Label Atto550     | ATGGATTTAGNNNN                               |                                      |
| Adaptor for L1+2+3 (Hulu 2.0) | ACCGTGTCTGGGCGATAC-CGATTAGGGTGAGTT-TAGTCGAGC |                                      |
| L1                            | AAAC <sub>z</sub> CACCCTAATC                 | z, Amino-C6-dT with Atto/Alexa dyes  |
| L2                            | GGTA <sub>z</sub> CGCCC                      | z, Amino-C6-dT with Atto/Alexa dyes  |
| L3                            | AGGACACGGT                                   | 3' end modified with Atto/Alexa dyes |

Table 2: HuluFISH probe sequences

| Oligo_Name | Sequence             |
|------------|----------------------|
| Gapdh_old  | ATGAACCTAAGCTGGGA    |
| Gapdh_old  | AGGAAACACTCTCCTGA    |
| Gapdh_old  | TCACCATTTTGTCTACG    |
| Gapdh_old  | CCAAATCCGTTCACACC    |
| Gapdh_old  | TCTCCACTTTGCCACTG    |
| Gapdh_old  | AAGGGGTTCGTTGATGGCAA |
| Gapdh_old  | GACCATGTAGTTGAGGT    |
| Gapdh_old  | TGGAGTCATACTGGAAC    |
| Gapdh_old  | GTGCCGTTGAATTTGCC    |
| Gapdh_old  | CTTCCCATTCTCGGCCTTGA |
| Gapdh_old  | AAGATGGTGATGGGCTT    |
| Gapdh_old  | ATGTTAGTGGGGTCTCG    |
| Gapdh_old  | ACGACATACTCAGCACC    |

|           |                      |
|-----------|----------------------|
| Gapdh_old | CCATGGTGGTGAAGACA    |
| Gapdh_old | AGATGATGACCCTTTTG    |
| Gapdh_old | ACAAACATGGGGGCATC    |
| Gapdh_old | GACAATCTTGAGTGAGT    |
| Gapdh_old | AGTTGGTGGTGCAGGAT    |
| Gapdh_old | CCAAAGTTGTCATGGAT    |
| Gapdh_old | GGTCATGAGCCCTTCCACAA |
| Gapdh_old | TCTTCTGGGTGGCAGTGAT  |
| Gapdh_old | ATGATGTTCTGGGCAGC    |
| Gapdh_old | AGTGAGCTTCCCGTTCA    |
| Gapdh_old | TAGGAACACGGAAGGCCAT  |
| Gapdh_old | ACTTGGCAGGTTTCTCC    |
| Gapdh_old | ACCACCTTCTTGATGTC    |
| Gapdh_old | AAGATGCCCTTCAGTGG    |
| Gapdh_old | GTTGAAGTCGCAGGAGA    |
| Gapdh_old | AGGTGGAAGAGTGGGAGTT  |
| Gapdh_old | TTGAGAGCAATGCCAGC    |
| Gapdh_old | GGAAATGAGCTTGACAA    |
| Gapdh_old | AGCCGTATTCATTGTCA    |
| Nr2e1_old | AATGCGGCTTGTTGATC    |
| Nr2e1_old | TAGACCCCGTAGTGCTT    |
| Nr2e1_old | TTGAAGAATCCGGAGCA    |
| Nr2e1_old | GGTCCTATTCCTTCGAA    |
| Nr2e1_old | GGTTTCCAGACTTGCAG    |
| Nr2e1_old | TGTCTTGTCTACGGGGCAT  |
| Nr2e1_old | ACGCCCTGCATTGGTTT    |
| Nr2e1_old | TCCAAACACTTCTTCAG    |
| Nr2e1_old | GGCATCTTTGTTTCATGT   |
| Nr2e1_old | TGTTTGCGGATGGTGGA    |
| Nr2e1_old | TGTGAAGAAAGCAGGGG    |
| Nr2e1_old | TTCAGGAGTGGCAGACA    |
| Nr2e1_old | TTCATGGGGATACTTGG    |
| Nr2e1_old | AGATACATTGGGGTCCC    |
| Nr2e1_old | TTCACACACGGACTCAG    |
| Nr2e1_old | TAAAGAGAAGCCTGGCA    |
| Nr2e1_old | CTCTTTGCCCACTTGAT    |
| Nr2e1_old | CAAAGTGGAAAAGGCTG    |
| Nr2e1_old | TGGCCCATTGTGCTATT    |

|           |                       |
|-----------|-----------------------|
| Nr2e1_old | AGAGTGTTAGCATCAAC     |
| Nr2e1_old | ATTCATGCCAGATACAG     |
| Nr2e1_old | TCTGGGAGTCTGTGTTG     |
| Nr2e1_old | GCAAAGCCTGTATTTCA     |
| Nr2e1_old | CTAATCGGAGCTGTCTG     |
| Nr2e1_old | AGACAGGCAAATTCAGT     |
| Nr2e1_old | GGAACAGCTTTGAAAGT     |
| Nr2e1_old | CTCAGTTCAGAACCACT     |
| Nr2e1_old | ATCTTGAGAGCGGCAA      |
| Nr2e1_old | TGTTGAGAGTTAGCTGA     |
| Nr2e1_old | GGGTATCTGGTATGAAT     |
| Nr2e1_old | CTAATTGACCGTAAAGC     |
| Nr2e1_old | GTCACTGGATTTGTACA     |
| Gapdh_new | AACCTAAGCTGGGACCCC    |
| Gapdh_new | GGACGAGGAAACACTCTCCTG |
| Gapdh_new | CGACCTTCACCATTTTGTCT  |
| Gapdh_new | TGACCAGGCGCCCAATAC    |
| Gapdh_new | CAATCTCCACTTTGCCACTG  |
| Gapdh_new | ATGAAGGGGTCGTTGATGGCA |
| Gapdh_new | CCGTGAGTGGAGTCATACTGG |
| Gapdh_new | CCTTGACTGTGCCGTTGAATT |
| Gapdh_new | ATGACAAGCTTCCCATTCTCG |
| Gapdh_new | CTGGAAGATGGTGATGGGCTT |
| Gapdh_new | TGATGTTAGTGGGGTCTCGCT |
| Gapdh_new | CACGACATACTCAGCACCGG  |
| Gapdh_new | GGCTCCACCCTTCAAGTG    |
| Gapdh_new | GGGCGGAGATGATGACCCTTT |
| Gapdh_new | TCACAAACATGGGGGCATCGG |
| Gapdh_new | GGCTAAGCAGTTGGTGGTGC  |
| Gapdh_new | CCTTCCACAATGCCAAAGTTG |
| Gapdh_new | GTGATGGCATGGACTGTGGT  |
| Gapdh_new | GGCCATCCACAGTCTTCT    |
| Gapdh_new | TCACGCCACAGCTTTCCAGAG |
| Gapdh_new | GATGATGTTCTGGGCAGCC   |
| Gapdh_new | GGATGACCTTGCCCACAG    |
| Gapdh_new | GTGAGCTTCCCGTTCAGC    |
| Gapdh_new | AGGAACACGGAAGGCCATGC  |
| Gapdh_new | CATACTTGGCAGGTTTCTCC  |

|           |                        |
|-----------|------------------------|
| Gapdh_new | CTTCACCACCTTCTTGATGTC  |
| Gapdh_new | TCAGTGGGCCCTCAGATGCCT  |
| Gapdh_new | TCAGTGTAGCCCAAGATGCC   |
| Gapdh_new | TGCTGTTGAAGTCGCAGGAGA  |
| Gapdh_new | TTGAGAGCAATGCCAGCCCCG  |
| Gapdh_new | GCTGTAGCCGTATTCATTGTC  |
| Gapdh_new | AGTGTCCCTTGCTGGGGTGGGT |
| Tlx_new   | TTGGTTGTGCGCTGCCCTGCT  |
| Tlx_new   | TGATCCGGCGGGCTTGCTCAT  |
| Tlx_new   | CCACACACTTTGCAAGGGATA  |
| Tlx_new   | TAGTGCTTCCCGGAGCTG     |
| Tlx_new   | TTGAAGAATCCGGAGCAGCC   |
| Tlx_new   | TCCAGACTTGCAGACATAGGT  |
| Tlx_new   | TTGTCTACGGGGCATCCTCC   |
| Tlx_new   | CCTGCATTGGTTTCTGTGTGT  |
| Tlx_new   | GCACGGCATCTTTGTTTCATGT |
| Tlx_new   | GTTTGCGGATGGTGGACGTC   |
| Tlx_new   | GTCTTCCTTGTGTCCACGG    |
| Tlx_new   | CCGCTGTGAAGAAAGCAGGGG  |
| Tlx_new   | ACACAGCGGCCAACTCCAGAC  |
| Tlx_new   | ATGGGGATACTTGGGCGTGGG  |
| Tlx_new   | GTAGAGATACATTGGGGTCCC  |
| Tlx_new   | TCACACACGGACTCAGTGGC   |
| Tlx_new   | TGCCCACTTGATGCTCATAA   |
| Tlx_new   | TGGAAAAGGCTGGCACACTCT  |
| Tlx_new   | CGCGTCTTCCAAAAGCATCAG  |
| Tlx_new   | CCCATTGTGCTATTCCTAGA   |
| Tlx_new   | AGAGTGTTAGCATCAACCGGA  |
| Tlx_new   | ATTCATGCCAGATACAGCCAG  |
| Tlx_new   | TCTGGGAGTCTGTGTTGTCAG  |
| Tlx_new   | CCTCTTGCAAAGCCTGTATT   |
| Tlx_new   | AGCTGTCTGAACCGAGCCACC  |
| Tlx_new   | CCACTGTGTGTAGGAACAGCT  |
| Tlx_new   | GCATTCCGGAAACTTCTCAGT  |
| Tlx_new   | CATCTTGGAGAGCGGCAATGG  |
| Tlx_new   | CTGTTGAGAGTTAGCTGAGCC  |
| Tlx_new   | GGGTGGGGTATCTGGTATGAA  |
| Tlx_new   | TCTAATACTGCCCCATCTTG   |

|           |                                  |
|-----------|----------------------------------|
| Tlx_new   | TTGACCTGCATGTAGATGTCC            |
| Gapdh_tag | AACCTAAGCTGGGACCCcagctcgact      |
| Gapdh_tag | GGACGAGGAAACACTCTCCTGacgctcgact  |
| Gapdh_tag | CGACCTTCACCATTTTGTCTacgctcgact   |
| Gapdh_tag | TGACCAGGCGCCCAATACacgctcgact     |
| Gapdh_tag | CAATCTCCACTTTGCCACTGacgctcgact   |
| Gapdh_tag | ATGAAGGGGTTCGTTGATGGCAacgctcgact |
| Gapdh_tag | CCGTGAGTGGAGTCATACTGGacgctcgact  |
| Gapdh_tag | CCTTGACTGTGCCGTTGAATTacgctcgact  |
| Gapdh_tag | ATGACAAGCTTCCCATTCTCGacgctcgact  |
| Gapdh_tag | CTGGAAGATGGTGATGGGCTTacgctcgact  |
| Gapdh_tag | TGATGTTAGTGGGGTCTCGCTacgctcgact  |
| Gapdh_tag | CACGACATACTCAGCACCGGacgctcgact   |
| Gapdh_tag | GGCTCCACCCTTCAAGTGacgctcgact     |
| Gapdh_tag | GGGCGGAGATGATGACCCTTTacgctcgact  |
| Gapdh_tag | TCACAAACATGGGGGCATCGGacgctcgact  |
| Gapdh_tag | GGCTAAGCAGTTGGTGGTGCacgctcgact   |
| Gapdh_tag | CCTTCCACAATGCCAAAGTTGacgctcgact  |
| Gapdh_tag | GTGATGGCATGGACTGTGGTacgctcgact   |
| Gapdh_tag | GGCCATCCACAGTCTTCTacgctcgact     |
| Gapdh_tag | TCACGCCACAGCTTTCCAGAGacgctcgact  |
| Gapdh_tag | GATGATGTTCTGGGCAGCCacgctcgact    |
| Gapdh_tag | GGATGACCTTGCCCACAGacgctcgact     |
| Gapdh_tag | GTGAGCTTCCCGTTCAGCacgctcgact     |
| Gapdh_tag | AGGAACACGGAAGGCCATGCacgctcgact   |
| Gapdh_tag | CATACTTGGCAGGTTTCTCCacgctcgact   |
| Gapdh_tag | CTTACCACCTTCTTGATGTCacgctcgact   |
| Gapdh_tag | TCAGTGGGCCCTCAGATGCCacgctcgact   |
| Gapdh_tag | TCAGTGTAGCCCAAGATGCCacgctcgact   |
| Gapdh_tag | TGCTGTTGAAGTCGCAGGAGAcgctcgact   |
| Gapdh_tag | TTGAGAGCAATGCCAGCCCCGacgctcgact  |
| Gapdh_tag | GCTGTAGCCGTATTCATTGTCacgctcgact  |
| Gapdh_tag | AGTGTCCCTTGCTGGGGTGGGTacgctcgact |
| Nr2e1_tag | TTGGTTGTGCGCTGCCCTGCTacgctcgact  |
| Nr2e1_tag | TGATCCGGCGGGCTTGCTCATacgctcgact  |
| Nr2e1_tag | CCACACACTTTGCAAGGGATAacgctcgact  |
| Nr2e1_tag | TAGTGCTTCCCGGAGCTGacgctcgact     |
| Nr2e1_tag | TTGAAGAATCCGGAGCAGCCacgctcgact   |



Nr2e1\_tag TCCAGACTTGCAGACATAGGTacgctcgact  
 Nr2e1\_tag TTGTCTACGGGGCATCCTCCacgctcgact  
 Nr2e1\_tag CCTGCATTGGTTTCTGTGTGTacgctcgact  
 Nr2e1\_tag GCACGGCATCTTTGTTTCATGTacgctcgact  
 Nr2e1\_tag GTTTGC GGATGGTGGACGTCacgctcgact  
 Nr2e1\_tag GTCTTCCTTGTGTCCACGGacgctcgact  
 Nr2e1\_tag CCGCTGTGAAGAAAGCAGGGGacgctcgact  
 Nr2e1\_tag ACACAGCGGCCAACTCCAGACacgctcgact  
 Nr2e1\_tag ATGGGGATACTTGGGCGTGGGacgctcgact  
 Nr2e1\_tag GTAGAGATACATTGGGGTCCCacgctcgact  
 Nr2e1\_tag TCACACACGGACTCAGTGGCacgctcgact  
 Nr2e1\_tag TGCCCACTTGATGCTCATAAacgctcgact  
 Nr2e1\_tag TGGAAAAGGCTGGCACACTCTacgctcgact  
 Nr2e1\_tag CGCGTCTTCCAAAAGCATCAGacgctcgact  
 Nr2e1\_tag CCCATTGTGCTATTCCTAGAacgctcgact  
 Nr2e1\_tag AGAGTGTTAGCATCAACCGGAacgctcgact  
 Nr2e1\_tag ATTCATGCCAGATACAGCCAGacgctcgact  
 Nr2e1\_tag TCTGGGAGTCTGTGTTGTTCAGacgctcgact  
 Nr2e1\_tag CCTCTTGCAAAGCCTGTATTacgctcgact  
 Nr2e1\_tag AGCTGTCTGAACCGAGCCACCacgctcgact  
 Nr2e1\_tag CCACTGTGTGTAGGAACAGCTacgctcgact  
 Nr2e1\_tag GCATTCCGGAAACTTCTCAGTacgctcgact  
 Nr2e1\_tag CATCTTGGAGAGCGGCAATGGacgctcgact  
 Nr2e1\_tag CTGTTGAGAGTTAGCTGAGCCacgctcgact  
 Nr2e1\_tag GGGTGGGGTATCTGGTATGAAacgctcgact  
 Nr2e1\_tag TCTAATACTGCCCCATCTTGacgctcgact  
 Nr2e1\_tag TTGACCTGCATGTAGATGTCCacgctcgact  
 Chd7\_tag ATCATCCCTGGGTCCGCCATacgctcgact  
 Chd7\_tag CCCATCCTCGCCAAAAGACTacgctcgact  
 Chd7\_tag ACATTCCCCGAGGCCTTCacgctcgact  
 Chd7\_tag TCACGGGGTTTTTCGGGGTAGCacgctcgact  
 Chd7\_tag CCTTGGTCTATGGGCATCTGacgctcgact  
 Chd7\_tag GGGATGGCTGTAAGGAGGGAAacgctcgact  
 Chd7\_tag TCATTCCGGTTAGGCTGATCCacgctcgact  
 Chd7\_tag GTGATACTGTGAGTGCGGAGAacgctcgact  
 Chd7\_tag ACTCCCATCTGACCGCCACCAacgctcgact  
 Chd7\_tag TTCGTTCTGGATGCCGGGATAacgctcgact  
 Chd7\_tag GCCGCCATCCACAAAAGATTacgctcgact

|           |                                  |
|-----------|----------------------------------|
| Chd7_tag  | GCTCGTATCTGGTCTGGTACacgctcgact   |
| Chd7_tag  | GCCCATCTGCTGCATGTGacgctcgact     |
| Chd7_tag  | AATCCCCACGTGCCAGATAGCacgctcgact  |
| Chd7_tag  | ACTGGCCCATCCTCTGCTGTGacgctcgact  |
| Chd7_tag  | CCTGACTGAGGCCCTCTTAcgctcgact     |
| Chd7_tag  | GAGGTGGCAATGAAAGGGCTTAcgctcgact  |
| Chd7_tag  | GTGATGGTGGAACTGCTGCTGacgctcgact  |
| Chd7_tag  | GAATCTGGGACTGTGGGCAACacgctcgact  |
| Chd7_tag  | CTTGTTGAGGAGGGTTGGGGGacgctcgact  |
| Chd7_tag  | AGGGTTTGTGGCCTGACAGCacgctcgact   |
| Chd7_tag  | GGACTGTCTGGTTCCGAGAAacgctcgact   |
| Chd7_tag  | CCCTGAGTTGTTTACAGTAGGacgctcgact  |
| Chd7_tag  | GGAGTACTGTTTGTAAGGCCacgctcgact   |
| Chd7_tag  | GGTATCTTGGTACCGACTGATAcgctcgact  |
| Chd7_tag  | CCACTGTTTGACGGGAATCCacgctcgact   |
| Chd7_tag  | GAGTGGATAGGCTGCTGGTGacgctcgact   |
| Chd7_tag  | GTTCATTTGGTTCAGTGAGCCacgctcgact  |
| Chd7_tag  | GCTGTGAAGGGTGCATAGTTTAcgctcgact  |
| Chd7_tag  | GGAGAGGCGTACGTTCCCTGAacgctcgact  |
| Chd7_tag  | GCTGGGTTACTCATTGCTTTAcgctcgact   |
| Chd7_tag  | CCAACTTCCATGGGCATCCacgctcgact    |
| Ascl1_tag | GCGCCTTCTCGGTTTTAAAAGacgctcgact  |
| Ascl1_tag | ATCGTCTTCCCTCTGCGCacgctcgact     |
| Ascl1_tag | GCAGAGTTGTCAGGCTGCAGCacgctcgact  |
| Ascl1_tag | GGGGAAGAAACGCGCAGAAGGacgctcgact  |
| Ascl1_tag | AGGAGAGGGGAGAAACGAGCCacgctcgact  |
| Ascl1_tag | GCACGATCAAAGGGGGACGAAacgctcgact  |
| Ascl1_tag | AACGAGTTGGGGACGCAGGGTAcgctcgact  |
| Ascl1_tag | CACTCTCCATCTTGCCAGAGacgctcgact   |
| Ascl1_tag | CGGTCGCAAAGAAGCAGGCTGacgctcgact  |
| Ascl1_tag | TGACTTGTGACCGCCCCCTGAacgctcgact  |
| Ascl1_tag | TGGCGCTTGACCTGCTTGacgctcgact     |
| Ascl1_tag | AGCGCATCAGTTCCGGAGAGacgctcgact   |
| Ascl1_tag | CTGAAGTTGAGCCGGCGTTTTGacgctcgact |
| Ascl1_tag | AACTTGACCCGTTGCGCTCGacgctcgact   |
| Ascl1_tag | TCTTCTTGTTGGCCGCGCacgctcgact     |
| Ascl1_tag | TAGTTGGGGGAGATGGTGGGCacgctcgact  |
| Ascl1_tag | CGCCATAGAGTTCAAGTCGTTAcgctcgact  |

|           |                                 |
|-----------|---------------------------------|
| Ascl1_tag | TCGGAGGAGTAGGACGAGACCacgctcgact |
| Ascl1_tag | GGCTAAGAGGGTCGTAGGATCacgctcgact |
| Ascl1_tag | TCCAGCAGCTCTTGTTCCCTCacgctcgact |
| Ascl1_tag | TCCATTCCCAGGAGAGCCacgctcgact    |
| Ascl1_tag | GGATCTGCTGCCATCCTGacgctcgact    |
| Ascl1_tag | CCCATTTGACGTCGTTGGCacgctcgact   |
| Ascl1_tag | TTTCCCCTTGTTTTTCTGCCacgctcgact  |
| Ascl1_tag | GGCTGTCTGGTTTGTGTTTGTacgctcgact |
| Ascl1_tag | ATCTTAGTGAAGGTGCCCCacgctcgact   |
| Ascl1_tag | CCCTGTTTGCTGAGAACATTGacgctcgact |
| Ascl1_tag | TCACTCTTCTCGTGTCTGGAaAcgctcgact |
| Ascl1_tag | TCGGGCTTAGGTTCCAGACACacgctcgact |
| Ascl1_tag | CCAGGAAAGGAACCCATCTGTacgctcgact |
| Ascl1_tag | GTGTGTGTGTGACGCTCTTGacgctcgact  |
| Ascl1_tag | CCTGTTAGTGGTTGGGAGTTAacgctcgact |
| Pax6_tag  | CCGCTGTGACTGTTCTGCATacgctcgact  |
| Pax6_tag  | GACACCACCAAGCTGATTCACacgctcgact |
| Pax6_tag  | TACGATCTTCTGCCGGGTGacgctcgact   |
| Pax6_tag  | TTCGGGAAATGTCGCACGGCCacgctcgact |
| Pax6_tag  | CAACCGTTGGATACCTGCAGaAcgctcgact |
| Pax6_tag  | CCTGCCCAGAATTTACTCACacgctcgact  |
| Pax6_tag  | GGTCTGATGGAGCCAGTCTacgctcgact   |
| Pax6_tag  | CTTACTCCCTCCGATTGCCCTacgctcgact |
| Pax6_tag  | CCCGTTTATACTGGGCTATTacgctcgact  |
| Pax6_tag  | CCCAAGCAAAGATGGAAGGGCacgctcgact |
| Pax6_tag  | ACCCCTCGGATAATAATCTacgctcgact   |
| Pax6_tag  | CCAGGTTGCGAAGAACTCTGTacgctcgact |
| Pax6_tag  | GCCCATCTGTTGCTTTTCGacgctcgact   |
| Pax6_tag  | CCCGTTCAACATCCTTAGTTacgctcgact  |
| Pax6_tag  | GTACTGAAGTCCCGGATACacgctcgact   |
| Pax6_tag  | AGCCATCTTGCGTGGGTTGCCacgctcgact |
| Pax6_tag  | TCCCCCTCCTTCCTGTTGCTGacgctcgact |
| Pax6_tag  | GAGCTTCATCCGAGTCTTCTacgctcgact  |
| Pax6_tag  | TATTTCTTTGCAGCTTCCGCacgctcgact  |
| Pax6_tag  | CCTCAATCTGCTCTTGGGTAAacgctcgact |
| Pax6_tag  | CCTCTCAAACCTTTTCTCCAGacgctcgact |
| Pax6_tag  | CCGGGCAAACACATCTGGATAacgctcgact |
| Pax6_tag  | CCTGTATTCTTGCTTCAGGTacgctcgact  |

|          |                                  |
|----------|----------------------------------|
| Pax6_tag | CATTTGGCCCTTCGATTAGAacgctcgact   |
| Pax6_tag | GGTTCCTCAGTTTCTCTTCTCacgctcgact  |
| Pax6_tag | GTGTTGCTGGCCTGTCTTCTCacgctcgact  |
| Pax6_tag | GCTGCTGCTGATAGGAATGTGacgctcgact  |
| Pax6_tag | GCTGGTAGACACTGGTACTGAacgctcgact  |
| Pax6_tag | GGTGTGGTGGGCTGTGGGATTacgctcgact  |
| Pax6_tag | GTCTGTTCCGGCCCAACATGacgctcgact   |
| Pax6_tag | TGTACGTGTTGGTGAGGGCGGacgctcgact  |
| Pax6_tag | TGGTGAAGCTGGGCATGGGTGacgctcgact  |
| Pcna_tag | ACCCACCTCTCCTCAAGGacgctcgact     |
| Pcna_tag | GCAACCGTCTAATGCCGCacgctcgact     |
| Pcna_tag | CAACTACCAACCCTCTGCGCCacgctcgact  |
| Pcna_tag | CAAGGTCCCCCGATTACacgctcgact      |
| Pcna_tag | AAGAGGAACGAGGTCTGGCTGCacgctcgact |
| Pcna_tag | GGCGACTAGATGAGAGCTACTacgctcgact  |
| Pcna_tag | AGGATGGAGCCCTGGATCAGacgctcgact   |
| Pcna_tag | CCAGCAGGCCTCATTGATGAacgctcgact   |
| Pcna_tag | AGACGAGTCCATGCTCTGCacgctcgact    |
| Pcna_tag | GTAAGCTGTACCAAGGAGACGTacgctcgact |
| Pcna_tag | CGGTATGTGTGCGAAGCCTTCacgctcgact  |
| Pcna_tag | CCATGGCTAGGTTGCCGGTacgctcgact    |
| Pcna_tag | GGACATGCTGGTGAGGTTCAacgctcgact   |
| Pcna_tag | CTGCATTATCTTCAGCCCTTacgctcgact   |
| Pcna_tag | GGTGCTTCGAATACTAGTGCTAacgctcgact |
| Pcna_tag | GCTCCACATCTAAGTCCATTacgctcgact   |
| Pcna_tag | ACTCCTGTTCTGGGATTCCacgctcgact    |
| Pcna_tag | CGGCATCTTTATTACACAGCTGacgctcgact |
| Pcna_tag | CATATACGTGCAAATTCACCCGacgctcgact |
| Pcna_tag | GGATATCACAACAGCATCTCCAacgctcgact |
| Pcna_tag | ACTTCACCCCATCTTTGCACAacgctcgact  |
| Pcna_tag | CCAAGCTCTCCACTTGCAGAAAacgctcgact |
| Pcna_tag | GCCTCCTCTTCTTTATCCACATacgctcgact |
| Pcna_tag | CAGGCTCATTCATCTCTATGGTacgctcgact |
| Pcna_tag | CCTCAGAGCAAACGTTAGGTGAacgctcgact |
| Pcna_tag | ACAGTGGAGTGGCTTTTGTGAAacgctcgact |
| Pcna_tag | TCTACAACAAGGGGCACATCTGacgctcgact |
| Pcna_tag | GTGTCCCATGTCAGCAATTTacgctcgact   |
| Pcna_tag | CATCTTCAATCTTGGGAGCCAacgctcgact  |

|          |                                  |
|----------|----------------------------------|
| Pcna_tag | GCATCTCAGGAGCAATCTTCAAacgctcgact |
| Pcna_tag | GAAAAGACCTCAGGACACGCTGacgctcgact |
| Pcna_tag | GGCACTGCTCTATGACTTTTCAacgctcgact |
| Sox2_tag | CTCCGTCTCCATCATGTTATacgctcgact   |
| Sox2_tag | TTCTTCTGGTTGCCGCCGGTCacgctcgact  |
| Sox2_tag | TCATGGGCCTCTTGACGCGGTacgctcgact  |
| Sox2_tag | CCCGGGACCATAACCATGAAGacgctcgact  |
| Sox2_tag | TCCTGGGCCATCTTACGCacgctcgact     |
| Sox2_tag | CGAGTTGTGCATCTTGGGGTTacgctcgact  |
| Sox2_tag | AAGTTTCCACTCCGCGCCAGacgctcgact   |
| Sox2_tag | GCTTGGCCTCGTCGATGAACacgctcgact   |
| Sox2_tag | CTCCTTCATGTGCAGAGCGacgctcgact    |
| Sox2_tag | CGGCCGGTATTTATAATCCGacgctcgact   |
| Sox2_tag | CTTCTTCATGAGCGTCTTGGTacgctcgact  |
| Sox2_tag | CTCCGGGAAGCGTGTACTTATacgctcgact  |
| Sox2_tag | AACCCCGCTCGCCATGCTGTTacgctcgact  |
| Sox2_tag | GTAGCTGTCCATGCGCTGacgctcgact     |
| Sox2_tag | TGACGTCGTAGCGGTGCATCGacgctcgact  |
| Sox2_tag | GCTGGTCATGGAGTTGTACTGacgctcgact  |
| Sox2_tag | AGCCGTTTCATGTAGGTCTGCCacgctcgact |
| Sox2_tag | TAGGACATGCTGTAGGTGGGCacgctcgact  |
| Sox2_tag | TGACCACAGAGCCCATGGAGCacgctcgact  |
| Sox2_tag | CTGGAGTGGGAGGAAGAGGTAacgctcgact  |
| Sox2_tag | TGCTGATCATGTCCCGGAGacgctcgact    |
| Sox2_tag | TGGTAGTGCTGGGCCATGTGacgctcgact   |
| Sox2_tag | TCACATGTGCGACAGGGGCAacgctcgact   |
| Sox2_tag | TCTCCAGTTCGCAGTCCAGCCacgctcgact  |
| Sox2_tag | CCCAATTCCCTTGTATCTCTacgctcgact   |
| Sox2_tag | ACTCTCCTCTTTTTGCACCCacgctcgact   |
| Sox2_tag | CGTTTCGCTGCGGAGATTTTTacgctcgact  |
| Sox2_tag | GGCATCACGGTTTTTGGCGTTAacgctcgact |
| Sox2_tag | CCCCAAAAGAAGTCCAAGAacgctcgact    |
| Sox2_tag | CCCTCAGGTTTTTCTCTGTACAacgctcgact |
| Sox2_tag | TACATGGTCCGATTCCCCCGacgctcgact   |
| Sox2_tag | GCCTAACGTACCACTAGAACTacgctcgact  |
| Hes5_tag | GGAGCTCTGGAGGCGATTAGacgctcgact   |
| Hes5_tag | CACGGTACTTGGGGCCATacgctcgact     |
| Hes5_tag | TGGGACTGAGCATCTCCACCGacgctcgact  |

|          |                                  |
|----------|----------------------------------|
| Hes5_tag | TCTTCTCCACCACCGGCTTCCacgctcgact  |
| Hes5_tag | TGCTGTTGATGCGGTCCCacgctcgact     |
| Hes5_tag | AGCTTGGAGTTGGGCTGGTGCacgctcgact  |
| Hes5_tag | CTCCAGGATGTCGGCCTTCTCacgctcgact  |
| Hes5_tag | TGTGTTTCAGGTAGCTGACGGacgctcgact  |
| Hes5_tag | TCGCTGTAGTCCCTGGTGCAGacgctcgact  |
| Hes5_tag | AACTGTACCGCCTCCTGCacgctcgact     |
| Hes5_tag | CAGCTTCATCTGCGTGTCCacgctcgact    |
| Hes5_tag | ATCCTCTGGTCCGCTCCAacgctcgact     |
| Hes5_tag | CCACATCCAGAGGAACGAGCTCacgctcgact |
| Hes5_tag | ACTGCGGCTGGGGAATGTCTTCacgctcgact |
| Hes5_tag | AGAAGGTAGCGGCCAACCTGacgctcgact   |
| Hes5_tag | AATGACCCTCCTGCTGGCCAacgctcgact   |
| Hes5_tag | CAACTCTGCACACACATTCTCTacgctcgact |
| Hes5_tag | GGCCCTGATTATCCCCAAATGAacgctcgact |
| Hes5_tag | GCAAACACAAAACAACCCACGacgctcgact  |
| Hes5_tag | GTGACCAGGAACTTCGCAGAcgctcgact    |
| Hes5_tag | AAATATCATAGAACCCCCGGTGacgctcgact |
| Hes5_tag | GTGAGCCAACCCCCGACTCTAacgctcgact  |
| Hes5_tag | CCCTGAAGAAAGTCCTCTACGGacgctcgact |
| Hes5_tag | GCAGTTCGCGCTTCACAAAAGacgctcgact  |
| Hes5_tag | AGCGCGCATCAGACAGCCAAGacgctcgact  |
| Hes5_tag | AGGATCATCGTGGAGACCCacgctcgact    |
| Hes5_tag | CCACCCATACAAAGGAATCCTacgctcgact  |
| Hes5_tag | TACAAAATCGTGCCACATGCacgctcgact   |
| Hes5_tag | CCCACATGACCAAGAGTTCAAacgctcgact  |
| Hes5_tag | GCCTTCAGAACAGCCTGTGacgctcgact    |

---
